# Supplementary figures and images for: DIA-Based Proteomics Identifies IDH2 as a Targetable Regulator of Acquired Drug Resistance in Chronic Myeloid Leukemia
Source: PubMed Central journal article supplement — Mol Cell Proteomics. 2021 Dec 16;21(2):100187. doi: 10.1016/j.mcpro.2021.100187 (PMC8800142; doi:10.1016/j.mcpro.2021.100187), 2021-12-16

**A**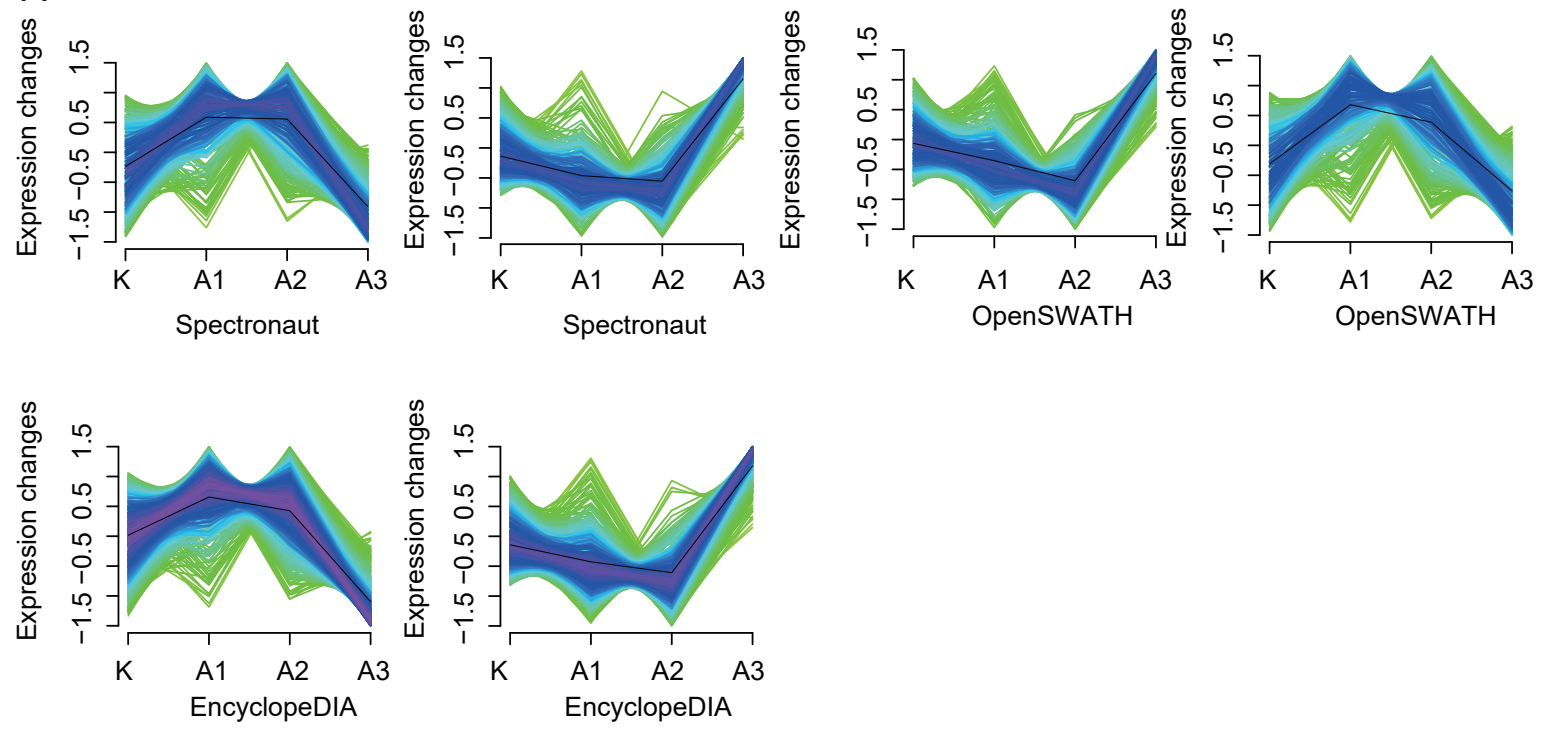**B**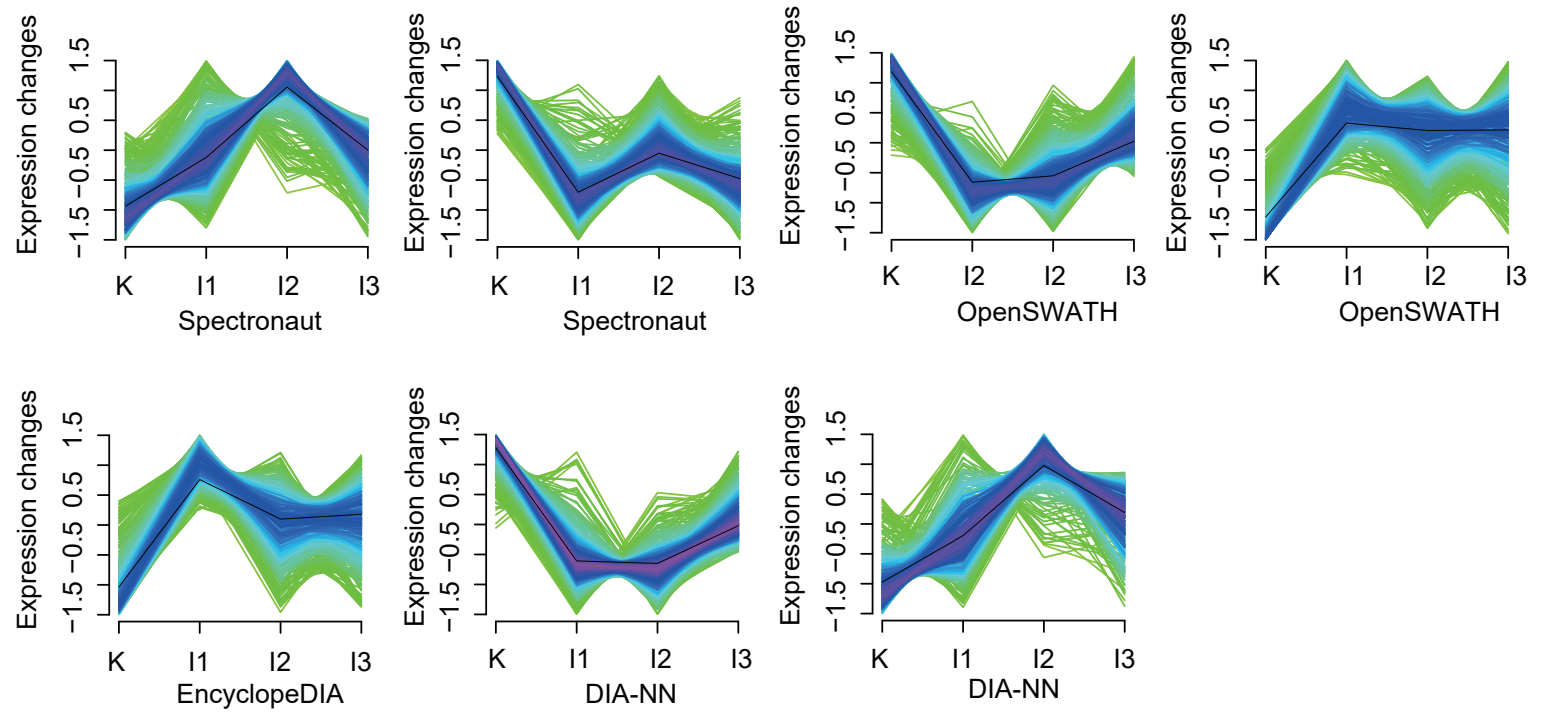

Supplement: mmc6.pdf [file mmc6.pdf]

**A**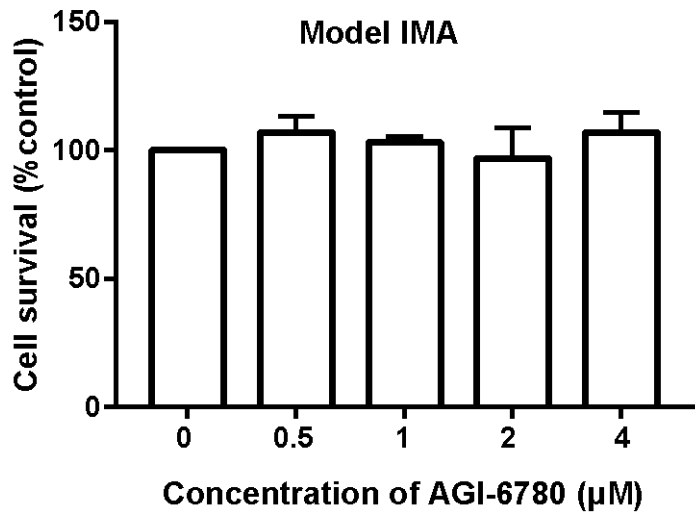**B**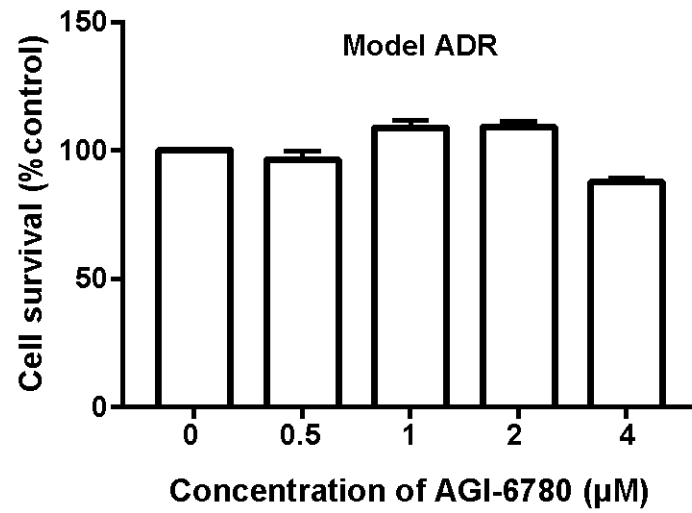**C**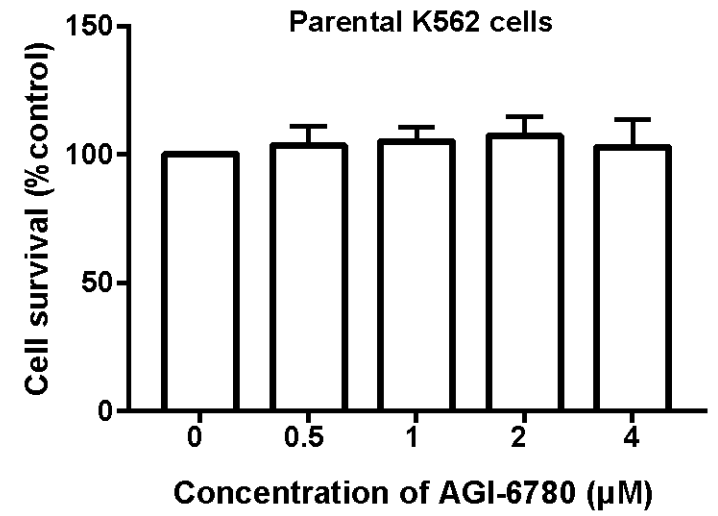

Supplement: mmc7.pdf [file mmc7.pdf]
